# Supplementary material for: Trabecular Meshwork TREK-1 Channels Function as Polymodal Integrators of Pressure and pH
Source: PubMed Central journal article supplement — Invest Ophthalmol Vis Sci. 2019 May;60(6):2294–303. doi: 10.1167/iovs.19-26851 (PMC6532698; doi:10.1167/iovs.19-26851), 2019-05
Supplement: iovs-60-06-10_s01.pdf [file iovs-60-06-10_s01.pdf]

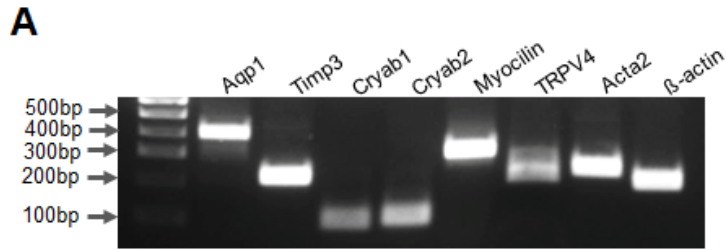

**B**

| Primer              | Sequence (5' to 3')    | NCBI Reference Sequence | PCR product |
|---------------------|------------------------|-------------------------|-------------|
| hMyoc sense         | GACACCGGATGTGGAGAACTA  | NM_000261.1             | 299bp       |
| hMyoc anti-sense    | GACTCAGCGCCCTGGAAATA   |                         |             |
| hAqp1 sense         | TTTGGGTATGAAGCCGTGTC   | NM_001185061.1          | 391bp       |
| hAqp1 anti-sense    | AGTCAATAGCCAGGAGGTGT   |                         |             |
| hActa2 sense        | AAAGCAAGTCTCCAGCG      | XM_011538636.2          | 200bp       |
| hActa2 anti-sense   | GCTTCACAGGATCCCGTC     |                         |             |
| hCryab1 sense       | GGTGGATAGAAGGGGGACA    | XM_011538636.2          | 94bp        |
| hCryab1 anti-sense  | TACTCACTGAGCTCAAGACA   |                         |             |
| hCryab2 sense       | AAACGGCCTGGGTGGATAGA   | NM_001885.2             | 100bp       |
| hCryab2 anti-sense  | CACTGAGCTCAAGACACACTTG |                         |             |
| hTimp3 sense        | CAAGATGTACACGGGGCTGT   | NM_000362.4             | 218bp       |
| hTimp3 anti-sense   | AGGCTGAGTGTTGGACTGG    |                         |             |
| hTRPV4 sense        | TCCATTCTTGCTGACCCAC    | XM_011538636.2          | 217bp       |
| hTRPV4 anti-sense   | AGGGCTGTCTGACCTCGATA   |                         |             |
| hβ-actin sense      | CCTTCCTCCACTGGTACAC    | XM_011538636.2          | 164bp       |
| hβ-actin anti-sense | TCTGCCTTAGGCCTCCTCCT   |                         |             |

**Figure S1.** (A) Representative quantitative PCR results demonstrating gene expression of aquaporin 1 (Aqp1); Tissue Inhibitor of Metalloproteinase 3 (TIMP3); crystalline, alpha B1 (Cryab1); crystalline, alpha B2 (Cryab2); myocilin, transient receptor potential 4; vanilloid family (TRPV4); smooth muscle  $\alpha$ 2 actin;  $\beta$  actin. (B) List of primers used for PCR reaction.
