# Supplementary material for: Trabecular Meshwork TREK-1 Channels Function as Polymodal Integrators of Pressure and pH
Source: PubMed Central journal article supplement — Invest Ophthalmol Vis Sci. 2019 May;60(6):2294–303. doi: 10.1167/iovs.19-26851 (PMC6532698; doi:10.1167/iovs.19-26851), 2019-05
Supplement: iovs-60-06-10_s02.pdf [file iovs-60-06-10_s02.pdf]

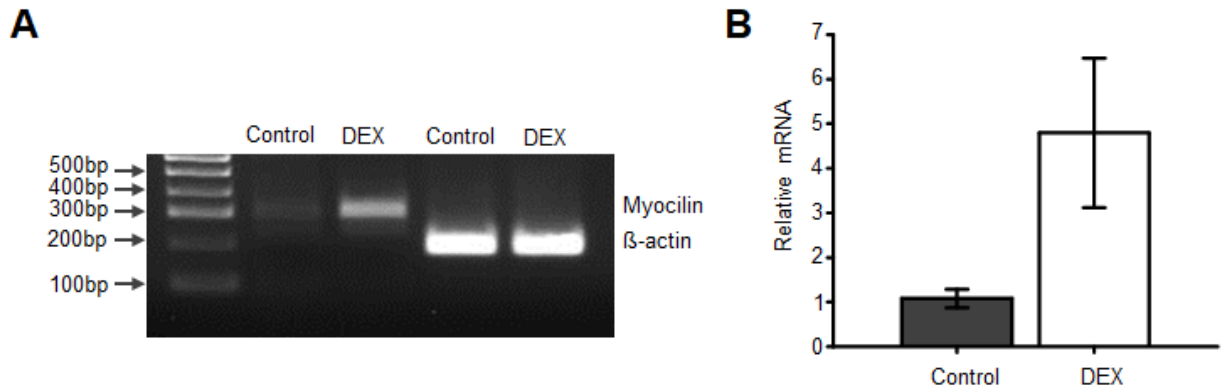

**Figure S2.** (A) Representative quantitative PCR data showing that dexamethasone (DEX) exposure upregulates the expression of the myocilin gene in hTM cells (DEX). Cell cultures were treated with DEX (500 nM) or with vehicle (control) for five days. (B) Quantification of the results from A, as the mean  $\pm$  S.E.M. N = three repeats.
